# Supplementary material for: Eating Occasions, Obesity and Related Behaviors in Working Adults: Does it Matter When You Snack?
Source: MDPI journal article supplement (doi:10.3390/nu11102320), 2019-10-01
Supplement: s1 [file s1]

## Supplementary Material

24. Describe how you eat during a **typical 24-hour** period. Record the time for each eating episode and mark with an **X** the type of meal which corresponds best.

### Example

**Note:** You can have several main meals during a day.  
Do not forget snack, other 'light meals', and drinks.

| Time     | Type of Meal                                                                           |                                                                                 |                                                                                                                 |                                                                        |
|----------|----------------------------------------------------------------------------------------|---------------------------------------------------------------------------------|-----------------------------------------------------------------------------------------------------------------|------------------------------------------------------------------------|
|          | Main Meal<br>(e.g., cooked dish, hearty soup with bread, Chef salad with bread, pizza) | Light Meal/Breakfast<br>(e.g., cooked or cold cereals, simple soup, side salad) | Snack Meal<br>(e.g., cookie, slice of cake/pie, energy bar, chips, fruit, candy, ice cream – w/ or w/o a drink) | Drink, only<br>(e.g., coffee, tea, soft drink, juice, milk beer, wine) |
| 6:30am   |                                                                                        |                                                                                 |                                                                                                                 | X                                                                      |
| 10:00 am |                                                                                        |                                                                                 | X                                                                                                               |                                                                        |
| 12:00 pm | X                                                                                      |                                                                                 |                                                                                                                 |                                                                        |
| 3:00 pm  |                                                                                        | X                                                                               |                                                                                                                 |                                                                        |
| 6:00 pm  | X                                                                                      |                                                                                 |                                                                                                                 |                                                                        |
| 9:00 pm  |                                                                                        |                                                                                 | X                                                                                                               |                                                                        |

(Please fill out table below.)

| Time | Type of Meal                                                                           |                                                                                 |                                                                                                                 |                                                                        |
|------|----------------------------------------------------------------------------------------|---------------------------------------------------------------------------------|-----------------------------------------------------------------------------------------------------------------|------------------------------------------------------------------------|
|      | Main Meal<br>(e.g., cooked dish, hearty soup with bread, Chef salad with bread, pizza) | Light Meal/Breakfast<br>(e.g., cooked or cold cereals, simple soup, side salad) | Snack Meal<br>(e.g., cookie, slice of cake/pie, energy bar, chips, fruit, candy, ice cream – w/ or w/o a drink) | Drink, only<br>(e.g., coffee, tea, soft drink, juice, milk beer, wine) |
|      |                                                                                        |                                                                                 |                                                                                                                 |                                                                        |
|      |                                                                                        |                                                                                 |                                                                                                                 |                                                                        |
|      |                                                                                        |                                                                                 |                                                                                                                 |                                                                        |
|      |                                                                                        |                                                                                 |                                                                                                                 |                                                                        |
|      |                                                                                        |                                                                                 |                                                                                                                 |                                                                        |
|      |                                                                                        |                                                                                 |                                                                                                                 |                                                                        |
|      |                                                                                        |                                                                                 |                                                                                                                 |                                                                        |
|      |                                                                                        |                                                                                 |                                                                                                                 |                                                                        |

**Figure S1.** Adaptation of eating pattern assessment<sup>1</sup> used in the Promoting Activity and Changes in Eating (PACE) study, 2005–2009.

- Berteus Forslund H, Lindroos AK, Sjostrom L, Lissner L. Meal patterns and obesity in Swedish women-a simple instrument describing usual meal types, frequency and temporal distribution. *European journal of clinical nutrition*. 2002;56(8):740-747.
